# Supplementary material for: Cancer risk in individuals with major birth defects: large Nordic population based case-control study among children, adolescents, and adults
Source: PubMed Central journal article supplement — BMJ. 2020 Dec 2;371:m4060. doi: 10.1136/bmj.m4060 (PMC7708828; doi:10.1136/bmj.m4060), 2020-12-02
Supplement: daid059263.ww1.pdf [file daid059263.ww1.pdf]

## Supplementary Content

|                                                                                                                                                                                                                                                                                                                                                                |    |
|----------------------------------------------------------------------------------------------------------------------------------------------------------------------------------------------------------------------------------------------------------------------------------------------------------------------------------------------------------------|----|
| Table A. Classification of cancer. ....                                                                                                                                                                                                                                                                                                                        | 2  |
| Figure A. Directed acyclic graph (DAG) illustrating confounder selection.....                                                                                                                                                                                                                                                                                  | 6  |
| Table B. Risk of any cancer in individuals with any, or specific, birth defects, stratified by age at diagnosis.....                                                                                                                                                                                                                                           | 7  |
| Table C. Risk of overall cancer in individuals with any, or specific, major birth defects, adjusted for country, birth year, sex and maternal age, among 62 295 cases and 724 542 controls. ....                                                                                                                                                               | 8  |
| Table D. Risk of overall cancer in individuals with any, or specific, major birth defects, adjusted for country, birth year, sex, maternal age and smoking in the time period when smoking information was collected (1991-2013 in Denmark, 1987-2013 in Finland, 1998-2013 in Norway, and 1982-2014 in Sweden), among 18 614 cases and 255 346 controls. .... | 9  |
| Table E. OR (99% CI) of overall cancer in individuals with any major birth defects, adjusted for country, birth year, sex, maternal age and IVF in the time period when IVF information was reported (1990-2013 in Finland, 1984-2013 in Norway, and 1995-2014 in Sweden). In total, 1 424 out of 140 639 children were conceived through IVF. ....            | 10 |

Table A. Classification of cancer. In Finland and Norway, we used ICD-O-3 codes for the whole period, in Denmark we used ICD-10 codes for the whole period, except for leukaemia and lymphoma which we classified according to ICD-O-3 morphology codes. In Sweden we used ICD-7 codes for the whole period.

| ICD-10 group                             | ICD-O-3 rev. 1                                                                                                                               |                                                                                                                                      | Swedish ICD-7                                 |
|------------------------------------------|----------------------------------------------------------------------------------------------------------------------------------------------|--------------------------------------------------------------------------------------------------------------------------------------|-----------------------------------------------|
|                                          | Topography                                                                                                                                   | Morphology Site                                                                                                                      |                                               |
| From Cancer in Norway 2017*              | Converting from ICD-O-3 to ICD-10 group, based on International classification of diseases for oncology (ICD-O) – 3rd edition, 1st revision. |                                                                                                                                      | Swedish ICD-7 with minor adjustments.         |
| 1 'Lip (C00)'                            | C00                                                                                                                                          | Lip                                                                                                                                  | 140.0, 140.1, 140.9                           |
| 2 'Tongue (C01–02)'                      | C01<br>C02                                                                                                                                   | Base of Tongue<br>Other and unspecified parts of tongue                                                                              | 141.0, 141.7, 141.9                           |
| 3 'Mouth, other (C03–06)'                | C03<br>C04<br>C05<br>C06                                                                                                                     | Gum<br>Floor of mouth<br>Palate<br>Other and unspecified parts of mouth                                                              | 143, 144, 141.8                               |
| 4 'Salivary glands (C07–08)'             | C07<br>C08                                                                                                                                   | Parotid gland<br>Other and unspecified major salivary glands                                                                         | 142                                           |
| 5 'Pharynx (C09–14)'                     | C09<br>C10<br>C11<br>C12<br>C13<br>C14                                                                                                       | Tonsil<br>Oropharynx<br>Nasopharynx<br>Pyramidal sinus<br>Hypopharynx<br>Other and ill-defined sites in lip, oral cavity and pharynx | 145.0, 145.7, 145.8, 145.9, 146, 147, 148     |
| 6 'Oesophagus (C15)'                     | C15                                                                                                                                          | Oesophagus                                                                                                                           | 150                                           |
| 7 'Stomach (C16)'                        | C16                                                                                                                                          | Stomach                                                                                                                              | 151                                           |
| 8 'Small intestine (C17)'                | C17                                                                                                                                          | Small intestine                                                                                                                      | 152                                           |
| 9 'Colon (C18)'                          | C18                                                                                                                                          | Colon                                                                                                                                | 153                                           |
| 10 'Rectum, rectosigmoid (C19–20)'       | C19<br>C20                                                                                                                                   | Rectosigmoid junction<br>Rectum                                                                                                      | 154.0                                         |
| 11 'Anus (C21)'                          | C21                                                                                                                                          | Anus and anal canal                                                                                                                  | 153.9, 154.1, 154.8                           |
| 12 'Liver (C22)'                         | C22                                                                                                                                          | Liver and intrahepatic bile ducts                                                                                                    | 155.0, 156                                    |
| 13 'Gallbladder, bile ducts (C23–24)'    | C23<br>C24                                                                                                                                   | Gallbladder<br>Other and unspecified parts of biliary tract                                                                          | 152.0, 155.1, 155.2, 155.3, 155.8, 155.9      |
| 14 'Pancreas (C25)'                      | C25                                                                                                                                          | Pancreas                                                                                                                             | 157, 195.5                                    |
| 15 'Other digestive organs (C26)'        | C26                                                                                                                                          | Other and ill-defined digestive organs                                                                                               |                                               |
| 16 'Nose, sinuses (C30–31)'              | C30<br>C31                                                                                                                                   | Nasal cavity and middle ear<br>Accessory sinuses                                                                                     | 160                                           |
| 17 'Larynx, epiglottis (C32)'            | C32                                                                                                                                          | Larynx                                                                                                                               | 161                                           |
| 18 'Lung, trachea (C33–34)'              | C33<br>C34                                                                                                                                   | Trachea<br>Bronchus and lung                                                                                                         | 162.0, 162.1                                  |
| 19 'Heart, mediastinum and pleura (C38)' | C38                                                                                                                                          | Heart, mediastinum, and pleura                                                                                                       | 162.2, 164, 197.5, (except if pad equals 776) |

| ICD-10 group                                              | ICD-O-3 rev. 1                                   |                                                                                                                                                                                               | Swedish ICD-7                                            |
|-----------------------------------------------------------|--------------------------------------------------|-----------------------------------------------------------------------------------------------------------------------------------------------------------------------------------------------|----------------------------------------------------------|
|                                                           | Topography                                       | Morphology Site                                                                                                                                                                               |                                                          |
| 20 'Bone (C40-41)'                                        | C40<br>C41                                       | Bones, joints and articular cartilage<br>Bones, joints and articular cartilage of other and unspecified sites                                                                                 | 196                                                      |
| 21 'Melanoma of the skin (C43)'                           | C44                                              | 872-879                                                                                                                                                                                       | 190                                                      |
| 22 'Skin, non-melanoma (C44)'                             | C44                                              | Skin (excludes skin of vulva C51, skin of penis C60.9, skin of scrotum C63.2)                                                                                                                 | 191                                                      |
| 23 'Mesothelioma (C45)'                                   | C _ _ _                                          | 905                                                                                                                                                                                           | 162.2, 197.5, 158 or 179.7, AND pad 776                  |
| 24 'Peripheral nerves and autonomic nervous system (C47)' | C47                                              | Peripheral nerves and autonomic nervous system (include autonomic nervous system, ganglia, nerve, parasympathetic nervous system, peripheral nerve, spinal nerve, sympathetic nervous system) | 193.3, 193.8, 193.9                                      |
| 25 'Soft tissues (C48-49)'                                | C48<br>C49                                       | Retroperitoneum and peritoneum<br>Connective, subcutaneous and other soft tissues                                                                                                             | 158 (except if pad equals 776), 197.0-197.4, 197.7-197.9 |
| 26 'Breast (C50)'                                         | C50                                              | Breast (excludes skin of breast C44.5)                                                                                                                                                        | 170                                                      |
| 27 'Other female genital (C51-52, C57.7-9)'               | C51<br>C52<br>C57.7<br>C57.8<br>C57.9            | Vulva<br>Vagina<br>Other specified parts of female genital organs<br>Overlapping lesion of female genital organs<br>Female genital tract, NOS                                                 | 176                                                      |
| 28 'Cervix uteri (C53)'                                   | C53                                              | Cervix uteri                                                                                                                                                                                  | 171                                                      |
| 29 'Corpus uteri (C54)'                                   | C54                                              | Corpus uteri                                                                                                                                                                                  | 172                                                      |
| 30 'Uterus, other (C55)'                                  | C55                                              | Uterus, NOS                                                                                                                                                                                   | 174                                                      |
| 31 'Ovary etc. (C56, C57.0-4)'                            | C56<br>C57.0<br>C57.1<br>C57.2<br>C57.3<br>C57.4 | Ovary<br>Fallopian tube<br>Broad ligament<br>Round ligament<br>Parametrium<br>Uterine adnexa                                                                                                  | 175                                                      |
| 32 'Placenta (C58)'                                       | C58                                              | Placenta                                                                                                                                                                                      | 173                                                      |
| 33 'Prostate (C61)'                                       | C61                                              | Prostate gland                                                                                                                                                                                | 177                                                      |
| 34 'Testis (C62)'                                         | C62                                              | Testis                                                                                                                                                                                        | 178                                                      |
| 35 'Other male genital (C60, C63)'                        | C60<br>C63                                       | Penis<br>Other and unspecified male genital organs                                                                                                                                            | 179 (except 179.7 if pad equals 776)                     |
| 36 'Kidney (excl. renal pelvis) (C64)'                    | C64                                              | Kidney                                                                                                                                                                                        | 180.0, 180.9                                             |
| 37 'Urinary tract (C65-68)'                               | C65<br>C66<br>C67                                | Renal pelvis<br>Ureter<br>Bladder                                                                                                                                                             | 180.1, 181                                               |

| ICD-10 group                                                             | ICD-O-3 rev. 1        |            |                                                                                                                                                                                 | Swedish ICD-7                          |
|--------------------------------------------------------------------------|-----------------------|------------|---------------------------------------------------------------------------------------------------------------------------------------------------------------------------------|----------------------------------------|
|                                                                          | Topography            | Morphology | Site                                                                                                                                                                            |                                        |
|                                                                          | C68                   |            | Other and unspecified urinary organs                                                                                                                                            |                                        |
| 38 'Eye (C69)'                                                           | C69                   |            | Eye and adnexa                                                                                                                                                                  | 192                                    |
| 39 'Central nervous system (C70–72, D32–33, D42–43)                      | C70<br>C71<br>C72     |            | Meninges<br>Brain<br>Spinal cord, cranial nerves and other parts of central nervous system (excludes peripheral nerves, sympathetic and parasympathetic nerves and ganglia C47) | 193.0,<br>193.1,193.8,193.9            |
| 40 Thyroid gland (C73)                                                   | C73                   |            | Thyroid gland                                                                                                                                                                   | 194                                    |
| 41 'Other endocrine glands (C37, C74-75, D35.2–35.4, D44.3–44.5)         | C37<br>C74<br>C75     |            | Thymus<br>Adrenal gland<br>Other endocrine glands and related structures                                                                                                        | 195, 164                               |
| 42 Other or unspecified (C39, C76, C80)                                  | C39<br><br>C76<br>C80 |            | Other and ill-defined sites within respiratory system and intrathoracic organs<br>Other and ill-defined sites<br>Unknown primary site                                           | 199, 163                               |
| 43 Hodgkin lymphoma (C81)                                                | C_ _ _                | 959-999**  | Lymphoid and hematopoietic diseases                                                                                                                                             | 201                                    |
| 44 Non-Hodgkin lymphoma (C82–86)                                         |                       |            |                                                                                                                                                                                 | 200.0, 200.1, 202.1, 202.2             |
| 45 Immunoproliferative disease (C88)                                     |                       |            |                                                                                                                                                                                 | 200.2, 200.3                           |
| 46 Multiple myeloma (C90)                                                |                       |            |                                                                                                                                                                                 | 203                                    |
| 47 Acute lymphatic leukaemia (C91.0)                                     |                       |            |                                                                                                                                                                                 | 204.0                                  |
| 48 Chronic lymphatic leukaemia (C91.1)                                   |                       |            |                                                                                                                                                                                 | 204.1                                  |
| 49 Other and unspecified lymphatic leukaemia (C91.2-9)                   |                       |            |                                                                                                                                                                                 | 202.4, 204.9                           |
| 50 Acute myeloid leukaemia (C92.0+C93.0+C94.0+C94.2+C94.4-5)             |                       |            |                                                                                                                                                                                 | 205.0, 206.0                           |
| 51 Chronic myeloid leukaemia (C92.1+C93.1+C94.1)                         |                       |            |                                                                                                                                                                                 | 205.1                                  |
| 52 Other and unspecified myeloid leukaemia (C92.2-9+C93.2-9+C94.3+C94.7) |                       |            |                                                                                                                                                                                 | 205.9                                  |
| 53 Leukaemia, cell unspecified (C95)                                     |                       |            |                                                                                                                                                                                 | 206.1, 206.9, 207.0, 207.2, 207.3, 209 |
| 54 Other hematopoietic diseases (C94.6, D45-47)                          |                       |            |                                                                                                                                                                                 | 208, 207.9                             |

\*Grouped according to *Cancer Registry of Norway. Cancer in Norway 2017 - Cancer incidence, mortality, survival and prevalence in Norway. Oslo: Cancer Registry of Norway (2018)* except for leukaemia (C91–95, D45-47) which is grouped according to classification table from NORDCAN with minor adjustments.

\*\*Classified by morphology according to conversion table from IARC. In addition, from ICD-O-3 rev.1: Morphology 9751/3 - Use this code for all types of Langerhans cell histiocytosis, including the former 9751/1 through 9754/3 terms.

Figure A. Directed acyclic graph (DAG) illustrating confounder selection.

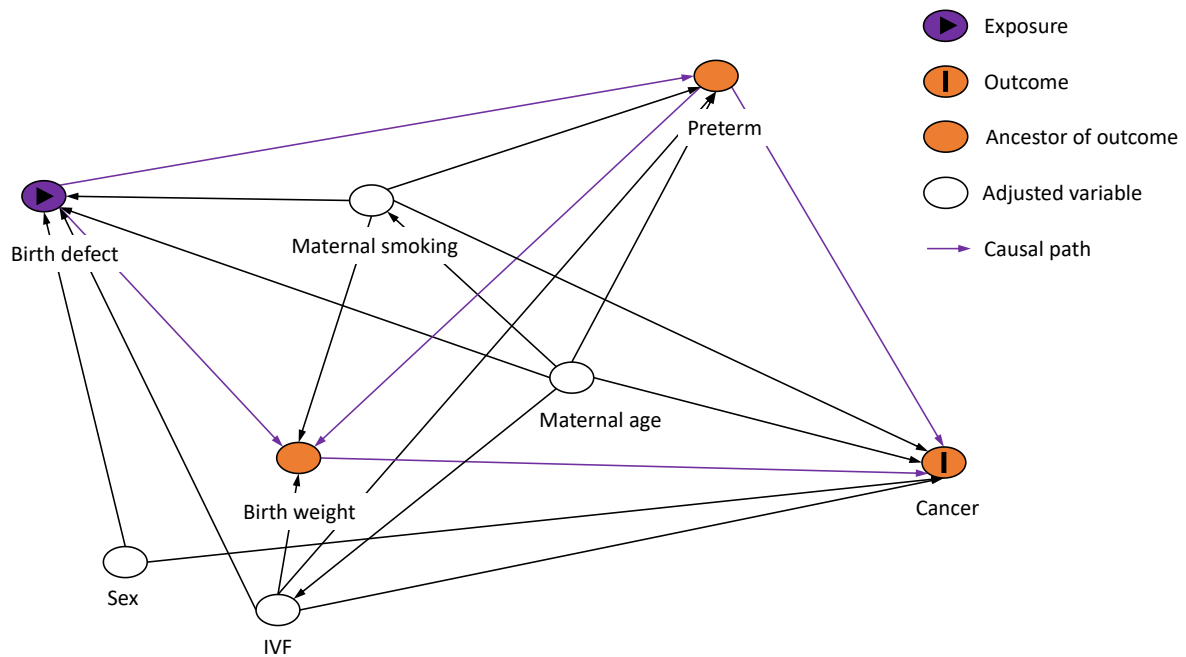

Potential confounders evaluated were sex, *in vitro* fertilization (IVF), maternal age, and maternal smoking. Since IVF and maternal smoking were only available in a subset of the study sample, adjustments for these were made in sensitivity analyses. We chose to perform the main analysis with minimal adjustment, including the matching variables (country and birth year) and sex only, since additional adjustment for maternal age did not change the effect estimates substantially. We did not adjust for intermediate factors (birth weight and being preterm) in order to estimate the total effect of birth defects on cancer risk.

Table B. Risk of any cancer in individuals with any, or specific, birth defects, stratified by age at diagnosis.

| Birth defect*                                | 0-14 years                     |                            |      |              | 15-19 years               |      |              | 20+ years                  |      |              |
|----------------------------------------------|--------------------------------|----------------------------|------|--------------|---------------------------|------|--------------|----------------------------|------|--------------|
|                                              | Controls<br>n (%)<br>N=724 542 | Cases<br>n (%)<br>N=19 881 | OR   | 99 % CI      | Cases<br>n (%)<br>N=6 346 | OR   | 99 % CI      | Cases n<br>(%)<br>N=36 068 | OR   | 99 % CI      |
| All anomalies                                | 15,826 (2.18)                  | 1,164 (5.85)               | 2.52 | 2.32 to 2.74 | 225 (3.55)                | 1.64 | 1.37 to 1.95 | 771 (2.14)                 | 1.22 | 1.11 to 1.35 |
| All anomalies excl.<br>chromosomal anomalies | 15,067 (2.08)                  | 887 (4.52)                 | 2.03 | 1.85 to 2.23 | 206 (3.26)                | 1.58 | 1.31 to 1.90 | 725 (2.01)                 | 1.21 | 1.09 to 1.33 |
| Nervous system                               | 593 (0.08)                     | 170 (0.9)                  | 9.72 | 7.66 to 12.3 | 12 (0.2)                  | 2.30 | 1.09 to 4.89 | 43 (0.12)                  | 1.76 | 1.16 to 2.65 |
| <i>NTD</i>                                   | 216 (0.03)                     | 62 (0.33)                  | 10.1 | 6.84 to 15.0 | 7 (0.11)                  | 3.93 | 1.46 to 10.6 | 21 (0.06)                  | 2.08 | 1.14 to 3.79 |
| Eye                                          | 373 (0.05)                     | 42 (0.22)                  | 3.54 | 2.29 to 5.46 | 6 (0.1)                   | 1.68 | 0.58 to 4.85 | 12 (0.03)                  | 0.88 | 0.41 to 1.88 |
| Ear, face and neck                           | 92 (0.01)                      | 4 (0.02)                   | 1.26 | 0.33 to 4.78 | 0 (0)                     |      |              | 4 (0.01)                   | 1.52 | 0.40 to 5.74 |
| CHD                                          | 3 512 (0.49)                   | 189 (1)                    | 1.53 | 1.26 to 1.86 | 47 (0.76)                 | 1.49 | 1.02 to 2.18 | 145 (0.41)                 | 1.28 | 1.02 to 1.59 |
| Respiratory system                           | 239 (0.03)                     | 16 (0.09)                  | 2.06 | 1.04 to 4.06 | 2 (0.03)                  | 0.93 | 0.15 to 5.81 | 6 (0.02)                   | 0.75 | 0.26 to 2.19 |
| Oro-facial clefts                            | 1 242 (0.17)                   | 48 (0.26)                  | 1.35 | 0.92 to 1.98 | 12 (0.2)                  | 1.08 | 0.51 to 2.29 | 56 (0.16)                  | 0.98 | 0.69 to 1.40 |
| <i>CPO</i>                                   | 397 (0.06)                     | 14 (0.07)                  | 1.05 | 0.52 to 2.14 | 4 (0.07)                  | 1.08 | 0.30 to 3.96 | 14 (0.04)                  | 0.90 | 0.44 to 1.83 |
| <i>CL</i>                                    | 846 (0.12)                     | 34 (0.18)                  | 1.51 | 0.95 to 2.38 | 8 (0.13)                  | 1.08 | 0.43 to 2.69 | 42 (0.12)                  | 1.01 | 0.67 to 1.53 |
| Digestive system                             | 764 (0.11)                     | 73 (0.39)                  | 2.93 | 2.11 to 4.06 | 8 (0.13)                  | 1.17 | 0.47 to 2.92 | 30 (0.08)                  | 1.03 | 0.63 to 1.67 |
| Abdominal wall defects                       | 119 (0.02)                     | 10 (0.05)                  | 2.04 | 0.85 to 4.87 | 1 (0.02)                  | 0.81 | 0.06 to 10.8 | 5 (0.01)                   | 1.04 | 0.32 to 3.45 |
| Urinary system                               | 782 (0.11)                     | 62 (0.33)                  | 2.00 | 1.41 to 2.83 | 19 (0.31)                 | 2.51 | 1.38 to 4.57 | 23 (0.07)                  | 1.03 | 0.59 to 1.78 |
| Genital organs                               | 2 538 (0.36)                   | 74 (0.39)                  | 1.25 | 0.92 to 1.70 | 21 (0.34)                 | 1.04 | 0.59 to 1.83 | 147 (0.41)                 | 1.43 | 1.14 to 1.78 |
| Limb                                         | 2 803 (0.39)                   | 115 (0.61)                 | 1.48 | 1.15 to 1.90 | 39 (0.63)                 | 1.60 | 1.05 to 2.43 | 138 (0.39)                 | 1.12 | 0.89 to 1.40 |
| Skeletal dysplasia                           | 114 (0.02)                     | 15 (0.08)                  | 3.59 | 1.74 to 7.42 | 4 (0.07)                  | 3.38 | 0.91 to 12.6 | 11 (0.03)                  | 3.54 | 1.54 to 8.15 |
| Genetic syndromes and<br>microdeletions      | 125 (0.02)                     | 44 (0.23)                  | 6.47 | 4.05 to 10.3 | 7 (0.11)                  | 4.64 | 1.70 to 12.7 | 3 (0.01)                   | 1.34 | 0.29 to 6.15 |
| Chromosomal                                  | 759 (0.11)                     | 277 (1.46)                 | 11.3 | 9.35 to 13.8 | 19 (0.31)                 | 2.75 | 1.51 to 5.00 | 46 (0.13)                  | 1.50 | 1.01 to 2.24 |
| Down syndrome                                | 604 (0.09)                     | 247 (1.3)                  | 13.3 | 10.8 to 16.4 | 16 (0.26)                 | 3.01 | 1.57 to 5.79 | 38 (0.11)                  | 1.42 | 0.92 to 2.21 |
| Other anomalies/<br>syndromes                | 2 790 (0.39)                   | 211 (1.11)                 | 3.11 | 2.57 to 3.76 | 60 (0.97)                 | 2.64 | 1.88 to 3.71 | 153 (0.43)                 | 1.24 | 1.00 to 1.54 |

ORs are adjusted for matching variables (birth year and country) and sex. In all analyses for specific sites, other than for chromosomal anomalies, individuals with chromosomal anomalies were excluded. In all analyses, the unexposed group was individuals without major birth defects. Abbreviations: OR odds ratio; CI confidence interval; *NTD* Neural Tube Defects; *CHD* Congenital Heart Defects; *CPO* Cleft palate only; *CL* Cleft lip with/ without cleft palate. \*Birth defects classified according to EUROCAT.

Table C. Risk of overall cancer in individuals with any, or specific, major birth defects, adjusted for country, birth year, sex and maternal age, among 62 295 cases and 724 542 controls.

| <b>Birth defect*</b>                      | <b>OR</b> | <b>99% CI</b> |
|-------------------------------------------|-----------|---------------|
| All anomalies                             | 1.73      | 1.63 to 1.84  |
| All anomalies excl. chromosomal anomalies | 1.54      | 1.44 to 1.64  |
| <i>Specific sites</i>                     |           |               |
| Nervous system                            | 4.76      | 3.89 to 5.83  |
| <i>NTD</i>                                | 4.99      | 3.61 to 6.91  |
| Eye                                       | 2.07      | 1.44 to 2.96  |
| Ear, face and neck                        | 1.13      | 0.44 to 2.93  |
| CHD                                       | 1.42      | 1.24 to 1.63  |
| Respiratory system                        | 1.24      | 0.71 to 2.15  |
| Oro-facial clefts                         | 1.12      | 0.87 to 1.44  |
| <i>CPO</i>                                | 0.97      | 0.60 to 1.56  |
| <i>CL</i>                                 | 1.18      | 0.88 to 1.59  |
| Digestive system                          | 1.85      | 1.43 to 2.41  |
| Abdominal wall defects                    | 1.52      | 0.76 to 3.02  |
| Urinary system                            | 1.76      | 1.34 to 2.30  |
| Genital organs                            | 1.30      | 1.09 to 1.55  |
| Limb                                      | 1.27      | 1.09 to 1.49  |
| Skeletal dysplasia                        | 3.34      | 1.97 to 5.67  |
| Genetic syndromes and microdeletions      | 5.42      | 3.56 to 8.25  |
| Chromosomal                               | 5.46      | 4.61 to 6.46  |
| <i>Down syndrome</i>                      | 5.99      | 4.99 to 7.20  |
| Other anomalies/ syndromes                | 1.95      | 1.70 to 2.23  |

In all analyses for specific sites, other than for chromosomal anomalies, individuals with chromosomal anomalies were excluded. In all analyses, the unexposed group was composed of individuals without major birth defects. Abbreviations: OR, odds ratio; CI, confidence interval; NTD, Neural Tube Defects; CHD, Congenital Heart Defects; CPO, Cleft palate only; CL, Cleft lip with/ without cleft palate. \*Categorized according to EUROCAT.



Table D. Risk of overall cancer in individuals with any, or specific, major birth defects, adjusted for country, birth year, sex, maternal age and smoking in the time period when smoking information was collected (1991-2013 in Denmark, 1987-2013 in Finland, 1998-2013 in Norway, and 1982-2014 in Sweden), among 18 614 cases and 255 346 controls.

| Birth defect*                             | Adjusted <sup>†</sup> for maternal age |              | Adjusted <sup>†</sup> for maternal age and smoking <sup>‡</sup> |              |
|-------------------------------------------|----------------------------------------|--------------|-----------------------------------------------------------------|--------------|
|                                           | OR                                     | 99% CI       | OR                                                              | 99% CI       |
| All anomalies                             | 2.29                                   | 2.12 to 2.49 | 2.36                                                            | 2.17 to 2.56 |
| All anomalies excl. chromosomal anomalies | 1.95                                   | 1.79 to 2.13 | 2.00                                                            | 1.82 to 2.19 |
| <i>Specific sites</i>                     |                                        |              |                                                                 |              |
| Nervous system                            | 6.06                                   | 4.60 to 8.00 | 5.97                                                            | 4.46 to 7.99 |
| <i>NTD</i>                                | 5.59                                   | 3.34 to 9.35 | 4.84                                                            | 2.73 to 8.56 |
| Eye                                       | 2.78                                   | 1.78 to 4.34 | 2.99                                                            | 1.90 to 4.70 |
| Ear, face and neck                        | 1.67                                   | 0.63 to 4.39 | 1.52                                                            | 0.54 to 4.27 |
| CHD                                       | 1.52                                   | 1.28 to 1.81 | 1.56                                                            | 1.30 to 1.87 |
| Respiratory system                        | 1.68                                   | 0.85 to 3.32 | 1.54                                                            | 0.74 to 3.18 |
| Oro-facial clefts                         | 1.13                                   | 0.76 to 1.70 | 1.22                                                            | 0.81 to 1.85 |
| <i>CPO</i>                                | 1.00                                   | 0.51 to 1.95 | 1.00                                                            | 0.50 to 1.99 |
| <i>CL</i>                                 | 1.22                                   | 0.73 to 2.04 | 1.38                                                            | 0.83 to 2.31 |
| Digestive system                          | 2.48                                   | 1.79 to 3.44 | 2.39                                                            | 1.68 to 3.40 |
| Abdominal wall defects                    | 1.12                                   | 0.37 to 3.35 | 0.84                                                            | 0.22 to 3.18 |
| Urinary system                            | 1.77                                   | 1.27 to 2.45 | 1.70                                                            | 1.21 to 2.40 |
| Genital organs                            | 1.33                                   | 1.01 to 1.77 | 1.40                                                            | 1.04 to 1.87 |
| Limb                                      | 1.60                                   | 1.27 to 2.01 | 1.70                                                            | 1.35 to 2.15 |
| Skeletal dysplasia                        | 3.92                                   | 2.17 to 7.07 | 3.91                                                            | 2.11 to 7.23 |
| Genetic syndromes and microdeletions      | 5.23                                   | 3.36 to 8.13 | 4.83                                                            | 3.05 to 7.66 |
| Chromosomal                               | 7.86                                   | 6.37 to 9.71 | 8.21                                                            | 6.59 to 10.2 |
| <i>Down syndrome</i>                      | 9.37                                   | 7.39 to 11.9 | 9.82                                                            | 7.66 to 12.6 |
| Other anomalies/ syndromes                | 3.46                                   | 2.90 to 4.12 | 3.52                                                            | 2.93 to 4.22 |

In all analyses for specific sites, other than for chromosomal anomalies, individuals with chromosomal anomalies were excluded. In all analyses, the unexposed group was composed of individuals without major birth defects. Abbreviations: OR, odds ratio; CI, confidence interval; NTD, Neural Tube Defects; CHD, Congenital Heart Defects; CPO, Cleft palate only; CL, Cleft lip with/ without cleft palate. \*Categorized according to EUROCAT. <sup>†</sup>Also adjusted for country, birth year and sex.

<sup>‡</sup>Smoking information was missing for 8.4% of cases and 8.7% of controls.

Table E. OR (99% CI) of overall cancer in individuals with any major birth defects, adjusted for country, birth year, sex, maternal age and IVF in the time period when IVF information was reported (1990-2013 in Finland, 1984-2013 in Norway, and 1995-2014 in Sweden). In total, 1 424 out of 140 639 children were conceived through IVF.

| <b>Birth defect</b>                       | <b>Adjusted for country, birth year, and sex</b> | <b>Adjusted for country, birth year, sex, and IVF</b> | <b>Adjusted for country, birth year, sex, IVF and maternal age</b> |
|-------------------------------------------|--------------------------------------------------|-------------------------------------------------------|--------------------------------------------------------------------|
| All anomalies excl. chromosomal anomalies | 2.22 (1.98 to 2.50)                              | 2.22 (1.98 to 2.50)                                   | 2.21 (1.96 to 2.48)                                                |
| Chromosomal anomalies                     | 10.3 (7.87 to 13.6)                              | 10.3 (7.86 to 13.6)                                   | 9.50 (7.22 to 12.5)                                                |

Abbreviations: OR, odds ratio; CI, confidence interval; IVF in vitro fertilization.
